# Supplementary material for: Single-site decorated copper enables energy- and carbon-efficient CO2 methanation in acidic conditions
Source: PubMed Central journal article supplement (PMC10247791; doi:10.1038/s41467-023-38935-2), 2023-06-07
Supplement: 41467_2023_38935_MOESM1_ESM.pdf [file 41467_2023_38935_MOESM1_ESM.pdf]

*Supplementary information*

**Single-site Decorated Copper Enables Energy- and Carbon-efficient CO<sub>2</sub> Methanation in Acidic Conditions**

Mengyang Fan<sup>1†</sup>, Rui Kai Miao<sup>1†</sup>, Pengfei Ou<sup>2†</sup>, Yi Xu<sup>1†</sup>, Zih-Yi Lin<sup>3</sup>, Tsung-Ju Lee<sup>3</sup>, Sung-Fu Hung<sup>3</sup>, Ke Xie<sup>2</sup>, Jianan Erick Huang<sup>2</sup>, Weiyang Ni<sup>2</sup>, Jun Li<sup>1</sup>, Yong Zhao<sup>1</sup>, Adnan Ozden<sup>1</sup>, Colin P O'Brien<sup>1</sup>, Yuanjun Chen<sup>2</sup>, Yurou Celine Xiao<sup>1</sup>, Shijie Liu<sup>1</sup>, Joshua Wicks<sup>2</sup>, Xue Wang<sup>2</sup>, Jehad Abed<sup>2</sup>, Erfan Shirzadi<sup>2</sup>, Edward H. Sargent<sup>2\*</sup> & David Sinton<sup>1\*</sup>

<sup>1</sup>*Department of Mechanical and Industrial Engineering, University of Toronto, 5 King's College Road, Toronto, Ontario, M5S 3G8, Canada.*

<sup>2</sup>*Department of Electrical and Computer Engineering, University of Toronto, 10 King's College Road, Toronto, Ontario, M5S 3G4, Canada.*

<sup>3</sup>*Department of Applied Chemistry, National Yang Ming Chiao Tung University, Hsinchu, Taiwan*

<sup>†</sup>*These authors contributed equally.*

*\*Corresponding email: [ted.sargent@utoronto.ca](mailto:ted.sargent@utoronto.ca) and [sinton@mie.utoronto.ca](mailto:sinton@mie.utoronto.ca)*

**Supplementary Note 1 | Energy assessment of the CO<sub>2</sub>R system.** Energy assessment was performed using an energy assessment model adopted from that reported in ref<sup>1,2</sup>. This section provides a brief description of the model along with the assumptions. The model uses the performance metrics of the CO<sub>2</sub>R system to estimate the energy intensity of producing CH<sub>4</sub> from CO<sub>2</sub>. These metrics include full-cell potential, single pass CO<sub>2</sub> conversion efficiency, Faradaic efficiency and current density – all towards CH<sub>4</sub>. The energy assessment was performed at various flow rates of feedstock CO<sub>2</sub> by using the associated performance metrics. H<sub>2</sub> produced from competing hydrogen evolution reaction (HER) was considered the only by-product at the cathodic stream, besides the unreacted CO<sub>2</sub> and CH<sub>4</sub>. Meanwhile, O<sub>2</sub> produced from oxygen evolution reaction (OER) was considered only product at the anodic stream, as the system enables local regeneration of CO<sub>2</sub>, and thereby blocking the CO<sub>2</sub> crossover to the anodic stream. To recover CH<sub>4</sub> from the unreacted CO<sub>2</sub> and H<sub>2</sub>, a pressure swing adsorption (PSA) module is modelled to be at the cathodic downstream. The CO<sub>2</sub> recovered from the cathodic stream is modelled to be recirculated to the cathode inlet for utilization in CO<sub>2</sub>R. Further details of the model and assumptions can be found in ref.<sup>1,2</sup>. An example energy cost calculation for the electrolyzer electricity, cathode separation, and anode separation is provided in Supplementary Note 2.

**Supplementary Note 2 | Example energy cost calculation for CO<sub>2</sub>-to-CH<sub>4</sub> conversion.** This section describes the energy cost associated with electrolyzer electricity, cathode separation, and anode separation in the acidic BP-MEA system. The calculation details are based on the performance metrics that enable the lowest energy intensity of producing CH<sub>4</sub> in the acidic BP-MEA system. These metrics include a full-cell voltage of 3.56 V, a CH<sub>4</sub> Faradaic efficiency of 71%, a CO<sub>2</sub>-to-CH<sub>4</sub> SPCE of 14%, and a current density of 100 mA cm<sup>-2</sup> (**Table 1**).

**Electrolyzer electricity.** We first calculate the production capacity of CH<sub>4</sub> on a molar basis for a constant production capacity of 100 tonne CH<sub>4</sub> per day.

$$Production\ rate\ \left[\frac{mol}{s}\right] = \frac{Production\ \left[\frac{g}{day}\right]}{molecular\ weight_{CH_4}\ \left[\frac{g}{mol}\right] \times 86400\ \left[\frac{s}{day}\right]} \quad (1a)$$

$$Production\ rate\ \left[\frac{mol}{s}\right] = \frac{100 \times \frac{10^6 g}{day}}{\frac{16 g}{mol} \times \frac{86400 s}{day}} = 72.3 \frac{mol}{s} \quad (1b)$$

Then, we calculate the current needed to electroproduce CH<sub>4</sub> at this productivity by using a CH<sub>4</sub> FE of 71%:

$$Total\ current\ required\ [A] = \frac{production\ rate\ \left[\frac{mol}{s}\right] \times No.\ e^- \ transferred \times Faraday's\ constant}{FE_{CH_4}} \quad (2a)$$

$$Total\ current\ needed\ [A] = \frac{72.3 \frac{mol}{s} \times 8 \times 96485 \frac{sA}{mol}}{71\%} = 78\ 642\ 573\ A \quad (2b)$$

Then, we calculate the power consumption by multiplying the current with the cell potential of 3.56 V:

$$\begin{aligned} \text{Power Consumed [W]} = \\ \text{Total current needed [A]} \times \text{Cell voltage [V]} = 78\,641\,526\text{ A} \times 3.56\text{ V} = 279\,968\text{ kW} \end{aligned} \quad (3)$$

Then, we find the energy required to meet the production capacity of 100 tonne per day:

$$\begin{aligned} \text{Electricity Energy Requirement} \left[ \frac{\text{GJ}}{\text{tonne}_{\text{CH}_4}} \right] = \\ \frac{\text{Power Consumed [W]} \times 24[\text{h}]}{\text{daily production [tonne]}} = \frac{279\,968\text{ kW} \times 24\text{ h} \times 0.0036\text{ GJ/kWh}}{100\text{ tonne}} = 241.9 \frac{\text{GJ}}{\text{tonne}_{\text{CH}_4}} \end{aligned} \quad (4)$$

**Cathode separation.** To estimate the energy cost associated with the recovery of CH<sub>4</sub> from the cathodic downstream, we assumed a pressure swing adsorption (PSA) separation module. The capital and operational energy cost of the PSA unit is hinged on a model built for biogas separation. The cathodic stream considers the presence of CH<sub>4</sub>, unreacted CO<sub>2</sub> and H<sub>2</sub> at the cathodic downstream. The model takes a cost of \$1 989 043 into account for a flow rate of 1000 m<sup>3</sup> h<sup>-1</sup> and uses a scaling factor of 0.7 and energy demand of 0.25 kWh m<sup>-3</sup>. According to this, we estimate the energy requirement:

$$\text{PSA operating energy} \left[ \frac{\text{kWh}}{\text{tonne}_{\text{CH}_4}} \right] = 0.25 \frac{\text{kWh}}{\text{m}^3} \times \text{flow rate} \left[ \frac{\text{m}^3}{\text{h}} \right] \times 24 \frac{\text{h}}{\text{day}} \quad (5a)$$

Prior to using this correlation, we estimate the flow rate at the cathodic stream. Assuming operation under the ideal conditions, we estimated the flow rate of CH<sub>4</sub>:

$$\text{Output CH}_4 \text{ flow rate} \left[ \frac{\text{m}^3}{\text{h}} \right] = \frac{100 \times 10^6 \frac{\text{g}}{\text{day}} \times 8.314 \text{ Jmol}^{-1}\text{K}^{-1} \times 298\text{K}}{16 \frac{\text{g}}{\text{mol}} \times 101\,300\text{ Pa} \times 24 \frac{\text{h}}{\text{day}}} = 6369 \frac{\text{m}^3}{\text{h}} \quad (6)$$

We then estimate the flow rates of CO<sub>2</sub>, CH<sub>4</sub>, and H<sub>2</sub> at the cathodic stream. The flow rate of CO<sub>2</sub> at the cathodic stream is calculated by using the experimentally achieved SPCE at a constant pressure. We note that this SPCE relates to the amount of CO<sub>2</sub> converted to that of unreacted CO<sub>2</sub>. We then calculate the output CO<sub>2</sub> flow rate considering a SPCE of 14%:

$$\text{Output CO}_2 \text{ flow rate} \left[ \frac{\text{m}^3}{\text{h}} \right] =$$

$$\text{CH}_4 \text{ flow rate} \left[ \frac{\text{m}^3}{\text{h}} \right] \times \text{molar ratio} \left[ \frac{\text{CO}_2}{\text{CH}_4} \right] \times \left( \frac{1 - \text{SPCE}}{\text{SPCE}} \right) \quad (7a)$$

$$\text{Output CO}_2 \text{ flow rate} \left[ \frac{\text{m}^3}{\text{h}} \right] = 6369 \frac{\text{m}^3}{\text{h}} \times 1 \times \frac{1 - 0.14}{0.14} = 39124 \frac{\text{m}^3}{\text{h}} \quad (7b)$$

We then calculate the current toward H<sub>2</sub>:

$$\text{Current toward } H_2[A] = \text{Total current needed}[A] \times \frac{1 - FE_{\text{methane}}}{1} \quad (8a)$$

$$\text{Current toward } H_2[A] = 78\,642\,573\,A \times \frac{1 - 0.71}{1} = 22\,806\,346\,A \quad (8b)$$

The production rate of  $H_2$  can also be calculated as follows.

$$H_2 \text{ production } \left[ \frac{\text{mol}}{h} \right] = \frac{\text{Current toward } H_2[A] \times 3600 \frac{s}{h}}{2 \frac{\text{electrons}}{H_2 \text{ product}} \times \text{Faraday's constant}} \quad (9a)$$

$$H_2 \text{ production } \left[ \frac{\text{mol}}{h} \right] = \frac{22\,806\,346\,A \times 3600 \frac{s}{hour}}{2 \frac{\text{electrons}}{H_2 \text{ product}} \times 96485 \frac{sA}{mol}} = 425\,463 \frac{\text{mol}}{h} \quad (9b)$$

Assuming an ideal gas under standard conditions, the flow rate of  $H_2$  can be calculated:

$$\text{flow rate}_{H_2} \left[ \frac{m^3}{h} \right] = \frac{H_2 \text{ production } \left[ \frac{\text{mol}}{h} \right] \times 8.314 \frac{J}{mol \times K} \times 298K}{101.3 \times 10^3 Pa} \quad (10a)$$

$$\text{flow rate}_{H_2} \left[ \frac{m^3}{h} \right] = \frac{425\,463 \frac{\text{mol}}{h} \times 8.314 \frac{J}{mol \times K} \times 298K}{101.3 \times 10^3 Pa} = 10\,405 \frac{m^3}{h} \quad (10b)$$

The total flow rate of the cathodic stream can then be calculated by using the flow rates of  $CH_4$ , unreacted  $CO_2$ , and  $H_2$  using:

$$\text{flow rate} \left[ \frac{m^3}{h} \right] = (6369 + 39124 + 10405) \frac{m^3}{h} = 55\,898 \frac{m^3}{h} \quad (11)$$

Next, we can calculate the energy required per tonne of  $CH_4$  produced by using:

$$\begin{aligned} \text{PSA Energy} \left[ \frac{GJ}{\text{tonne}_{CH_4}} \right] &= 0.25 \frac{kWh}{m^3} \times 55\,898 \frac{m^3}{h} \times 24 \frac{h}{day} \times \frac{0.0036 GJ kWh^{-1}}{100 \text{ tonne}_{CH_4}} \\ &= 12.1 \frac{GJ}{\text{tonne}_{CH_4}} \end{aligned} \quad (12)$$

In alkaline flow cell and neutral MEA,  $CO_2$  loss to crossover and/or carbonates reduces cathodic  $CO_2$  flow rate, and therefore, must be considered to correctly estimate  $CO_2$  flowrate at cathodic outlet. A crossover factor ( $CO_2$  crossover/ $CO_2$  reduced) of 4 and a carbonate loss factor ( $CO_2$  loss to carbonate/ $CO_2$  reduced) of 20 are considered for MEA and alkaline flow cell, respectively. The cathodic  $CO_2$  flow rate can be found using the equation below<sup>3,4</sup>:

$$\text{Output } CO_2 \text{ flow rate} \left[ \frac{m^3}{h} \right] =$$

$$\frac{CH_4 \text{ flow rate } \left[ \frac{m^3}{h} \right] \times \text{molar ratio } \left[ \frac{CO_2}{CH_4} \right]}{\left( \frac{SPCE}{1} \right)} \times \left( 1 - \frac{SPCE}{\text{loss factor} + 1} \right) \quad (13)$$

**Supplementary Note 3 | CO<sub>2</sub> loss to carbonate and energy cost calculation for CO<sub>2</sub> regeneration in alkaline flow cells.** In alkaline flow cell, input CO<sub>2</sub> is rapidly consumed by the excess of hydroxides in the catholytes according to Eq. 1.

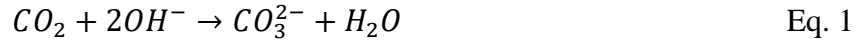

Prior reports had found that more than 20 CO<sub>2</sub> is lost to carbonates for every CO<sub>2</sub> reduced to product<sup>3,4</sup>. Current regeneration of CO<sub>2</sub> from carbonate solutions relies on calcium caustic loop, which requires a thermal energy input of 5.25 GJ/tonne CO<sub>2</sub><sup>5</sup>. CO<sub>2</sub> loss to carbonates in alkaline electrolytes per tonne of CH<sub>4</sub> can be calculated as:

$$\begin{aligned} CO_2 \text{ loss } \left[ \frac{\text{tonne } CO_2}{\text{tonne } CH_4} \right] &= \\ 1 \text{ tonne}_{CH_4} \times \frac{\text{molecular weight}_{CO_2} \left[ \frac{g}{mol} \right]}{\text{molecular weight}_{CH_4} \left[ \frac{g}{mol} \right]} \times \text{molar ratio } \left[ \frac{CO_2}{CH_4} \right] \times \text{carbonate loss factor} &= \\ 1 \text{ tonne}_{CH_4} \times \frac{44 \frac{g}{mol}}{16 \frac{g}{mol}} \times 1 \times 20 &= 55 \frac{\text{tonne } CO_2}{\text{tonne } CH_4} \end{aligned} \quad (14)$$

The thermal energy required to regenerate CO<sub>2</sub> from carbonate solutions can be found:

$$\begin{aligned} \text{Carbonate regeneration } \left[ \frac{GJ}{\text{tonne}_{CH_4}} \right] &= 5.25 \left[ \frac{GJ}{\text{tonne } CO_2} \right] \times CO_2 \text{ loss } \left[ \frac{\text{tonne } CO_2}{\text{tonne } CH_4} \right] \\ &= 5.25 \frac{GJ}{\text{tonne } CO_2} \times 55 \frac{\text{tonne } CO_2}{\text{tonne } CH_4} = 288.8 \frac{GJ}{\text{tonne}_{CH_4}} \end{aligned} \quad (15)$$

Recovering CO<sub>2</sub> from carbonate solutions costs 288.8 GJ/tonne CH<sub>4</sub> – more than five times of CH<sub>4</sub> heating value. Considering calcium caustic loop relies on high grade (>900°C) thermal input, this implies that regenerating loss CO<sub>2</sub> from alkaline flow cell requires consuming five times more fuels (typically CH<sub>4</sub>) than it is produced through electrolysis, making these systems unviable going forward.

**Supplementary Note 4 | CO<sub>2</sub> loss to crossover and energy cost calculation for CO<sub>2</sub>/O<sub>2</sub> separation in neutral MEAs.** CO<sub>2</sub> loss to carbonate is less severe in neutral MEAs compared to alkaline flow cell. In neutral MEAs, both CO<sub>2</sub>R and the competing HER generates hydroxides, and these hydroxides consumes CO<sub>2</sub> to form carbonates. Negatively charged carbonates migrate through the anion-selective membrane and revert back to CO<sub>2</sub> at the anode where oxygen evolution takes place, resulting a mixture of CO<sub>2</sub>/O<sub>2</sub>. This CO<sub>2</sub>/O<sub>2</sub> mixture could not be directly recirculated back to the cathode; rather, further separation is necessary. For CO<sub>2</sub>-to-CH<sub>4</sub> conversion, producing each CH<sub>4</sub> (or consuming each CO<sub>2</sub>) generates eight hydroxides (Eq. 2). These eight hydroxides consume at least four CO<sub>2</sub> (Eq. 3 or Eq. 4), limiting the maximum single-pass CO<sub>2</sub> conversion efficiency to 20% in neutral MEAs.

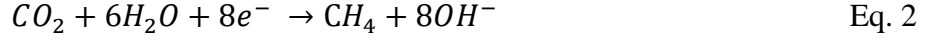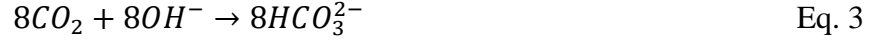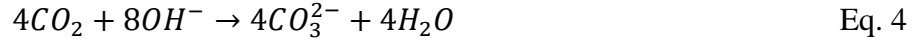

Separating this CO<sub>2</sub>/O<sub>2</sub> mixture currently require amine-based capture estimated at 4 GJ/tonne CO<sub>2</sub><sup>6</sup>. CO<sub>2</sub> crossover per tonne of CH<sub>4</sub> (ideal case: 100% CH<sub>4</sub> FE) can be calculated as:

$$CO_2 \text{ loss } \left[ \frac{\text{tonne } CO_2}{\text{tonne } CH_4} \right] =$$

$$\frac{1 \text{ tonne}_{CH_4} \times \frac{\text{molecular weight}_{CO_2} \left[ \frac{g}{mol} \right]}{\text{molecular weight}_{CH_4} \left[ \frac{g}{mol} \right]} \times \text{molar ratio } \left[ \frac{CO_2}{CH_4} \right] \times \text{crossover factor}}{FE_{\text{methane}}} =$$

$$\frac{1 \text{ tonne}_{CH_4} \times \frac{44 \frac{g}{mol}}{16 \frac{g}{mol}} \times 1 \times 4}{1} = 11 \frac{\text{tonne } CO_2}{\text{tonne } CH_4} \quad (16)$$

The energy input to separate CO<sub>2</sub> from anodic mixture can be found:

$$\text{Anode separation} \left[ \frac{GJ}{\text{tonne}_{CH_4}} \right] = 4 \left[ \frac{GJ}{\text{tonne } CO_2} \right] \times CO_2 \text{ loss} \left[ \frac{\text{tonne } CO_2}{\text{tonne } CH_4} \right]$$

$$= 4 \frac{GJ}{\text{tonne } CO_2} \times 11 \frac{\text{tonne } CO_2}{\text{tonne } CH_4} = 44 \frac{GJ}{\text{tonne}_{CH_4}} \quad (17)$$

Therefore, at 100% CH<sub>4</sub> FE, separating CO<sub>2</sub> from anodic CO<sub>2</sub>/O<sub>2</sub> mixture requires 44 GJ/tonne CH<sub>4</sub>. State-of-the-art CH<sub>4</sub> producing CO<sub>2</sub> electrolyzers have selectivity ranged from 60-80%, corresponding to an anode separation cost of 55-73 GJ/tonne CH<sub>4</sub>. This energy exceeds CH<sub>4</sub> heating value, implying that more thermal energy is required to recover CO<sub>2</sub> in neutral MEAs than that can be acquired from the produced CH<sub>4</sub>.

**Table S1 Electrolyzer energy distribution comparison of different systems**

| Parameters                             | CO <sub>2</sub> -to-CH <sub>4</sub><br>(Scenario 1) <sup>7</sup> | CO <sub>2</sub> -to-CH <sub>4</sub><br>(Scenario 2) <sup>8</sup> | CO <sub>2</sub> -to-CH <sub>4</sub><br>(This work) |              |
|----------------------------------------|------------------------------------------------------------------|------------------------------------------------------------------|----------------------------------------------------|--------------|
|                                        | Neutral<br>MEA                                                   | Alkaline<br>flow cell                                            | Acidic<br>microchannel-MEA                         |              |
| Systems                                |                                                                  |                                                                  |                                                    |              |
| Cell voltage (V)                       | 4.0                                                              | 4.0                                                              | 3.56                                               | 4.12         |
| Faradaic efficiency (%)                | 62                                                               | 82                                                               | 71                                                 | 64           |
| Current density (mA cm <sup>-2</sup> ) | 220                                                              | 480                                                              | 100                                                | 200          |
| Single pass conversion CH <sub>4</sub> | 1.6                                                              | 3.7                                                              | 14                                                 | 14           |
| Electrolyzer electricity               | 311.2                                                            | 235.3                                                            | 241.9                                              | 310.5        |
| Cathode separation (GJ/tonne)          | 20.6                                                             | 3.0                                                              | 12.1                                               | 12.9         |
| Anode separation (GJ/tonne)            | 71.0                                                             | 0.0                                                              | 0.0                                                | 0            |
| Carbonate regeneration                 | 0.0                                                              | 288.8                                                            | 0.0                                                | 0            |
| <b>Overall energy (GJ/tonne)</b>       | <b>402.8</b>                                                     | <b>527.1</b>                                                     | <b>254.0</b>                                       | <b>323.4</b> |

High energy efficiency scenario (Flow rate of CO<sub>2</sub> in Scenario 1. is 80 sccm, flow rate of CO<sub>2</sub> in Scenario 2 is 20 sccm, and flow rate of CO<sub>2</sub> in this work is 1.4 sccm) and performance metrics used as the input corresponding to those achieved with the flow rates listed above.

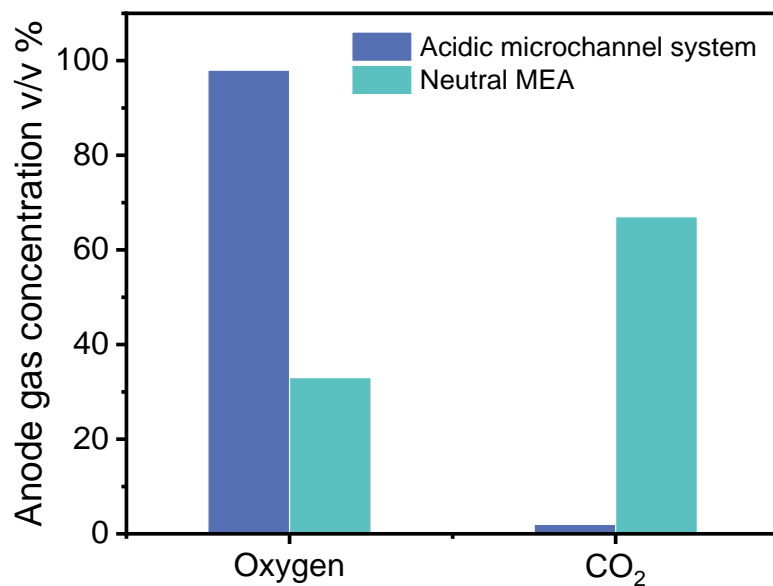

**Figure S1 Comparison of anodic CO<sub>2</sub> loss.** The neutral MEA used an AEM as membrane, and circulated 10 mM KHCO<sub>3</sub> as anolyte. The acidic MEA used the AEM/channeled CEM combination and circulated 5 mM H<sub>2</sub>SO<sub>4</sub> as anolyte. The applied current density was 100 mA cm<sup>-2</sup>.



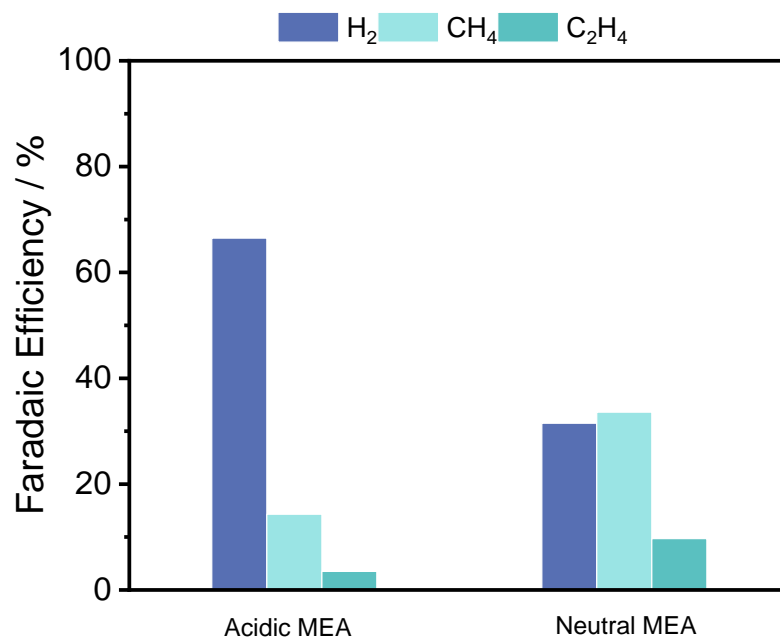

**Figure S2 CO<sub>2</sub>R performance comparison in different system.** The catalysts used here were all CuPc with a loading of 0.1 mg cm<sup>-2</sup>. The CO<sub>2</sub>R performances were tested under the same current density of 100 mA cm<sup>-2</sup>. In the acidic MEA, 5 mM H<sub>2</sub>SO<sub>4</sub> was used as the anolyte. In the neutral MEA, 10 mM KHCO<sub>3</sub> was used as anolyte.

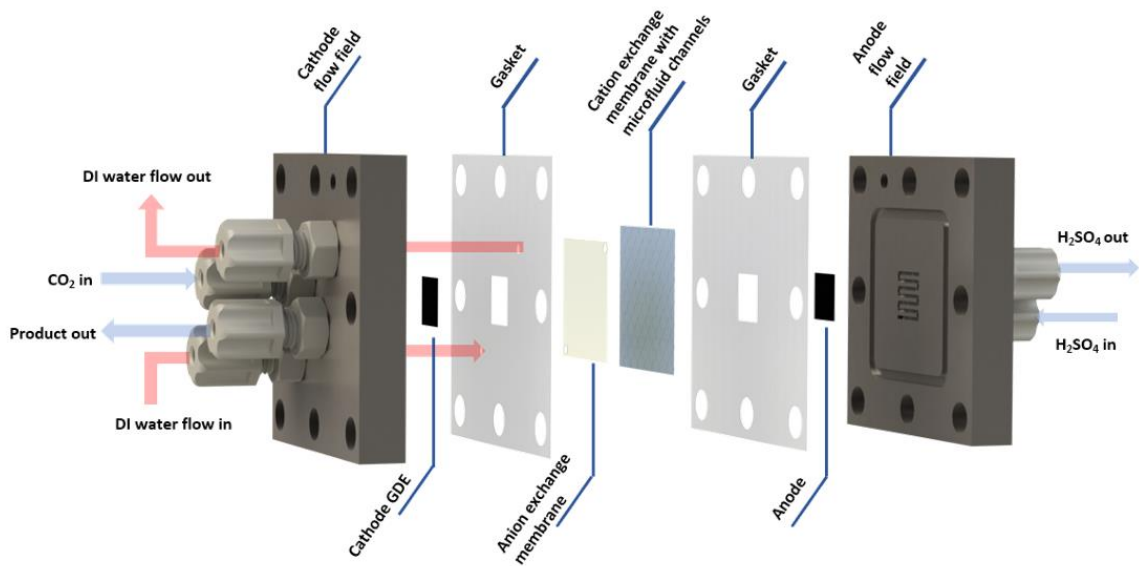

**Figure S3 Schematic illustration of the acidic channeled-MEA system.** The channeled CEM has a pore path of  $75\mu\text{m}$ . The analyte was circulated with  $5\text{ mM H}_2\text{SO}_4$ .

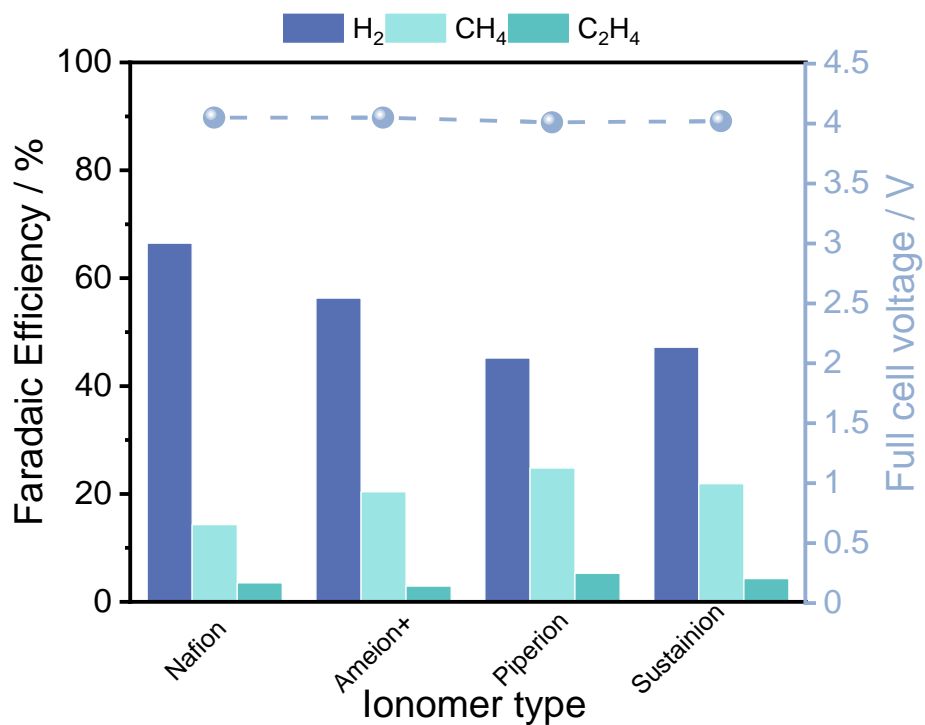

**Figure S4 CO<sub>2</sub>R performance comparison of different type of ionomer binders.** The catalysts used here were all CuPc with a loading of 0.1 mg cm<sup>-2</sup>. The CO<sub>2</sub>R performances were tested under the same current density of 100 mA cm<sup>-2</sup>. The cation exchange Nafion binder shows slightly higher H<sub>2</sub> FE compared to the other anion exchange binders.

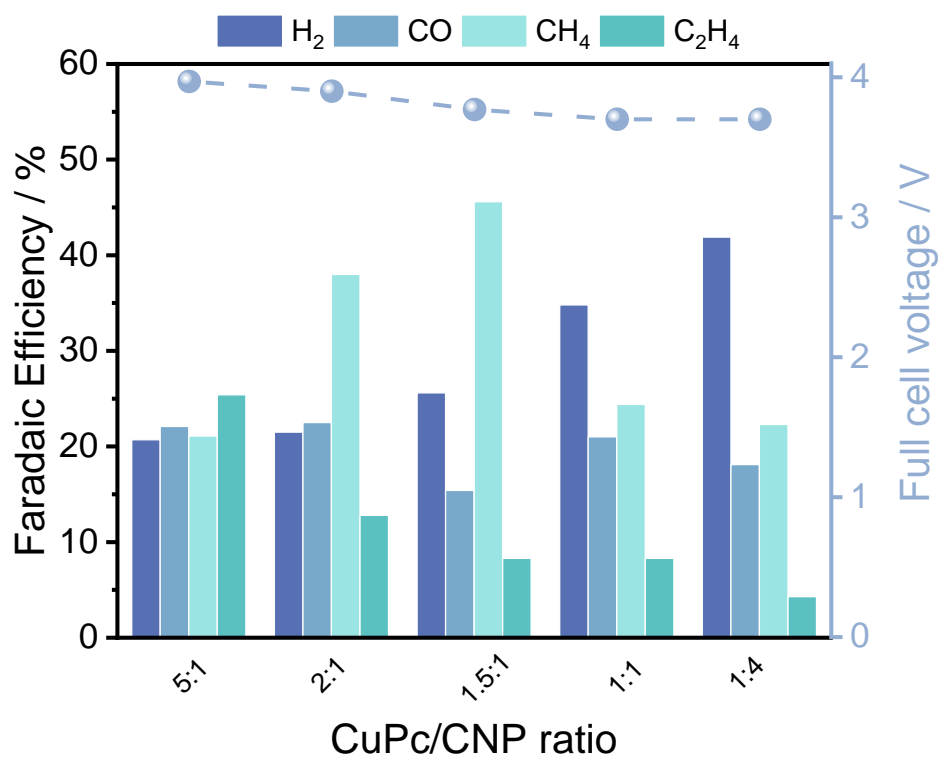

**Figure S5 Product distribution at different CuPc/CNP ratios.** Ionomer binder used in all cases was PiperIon. The tests were performed at a constant current of  $100 \text{ mA cm}^{-2}$ .  $5 \text{ mM H}_2\text{SO}_4$  was circulated as anolyte.

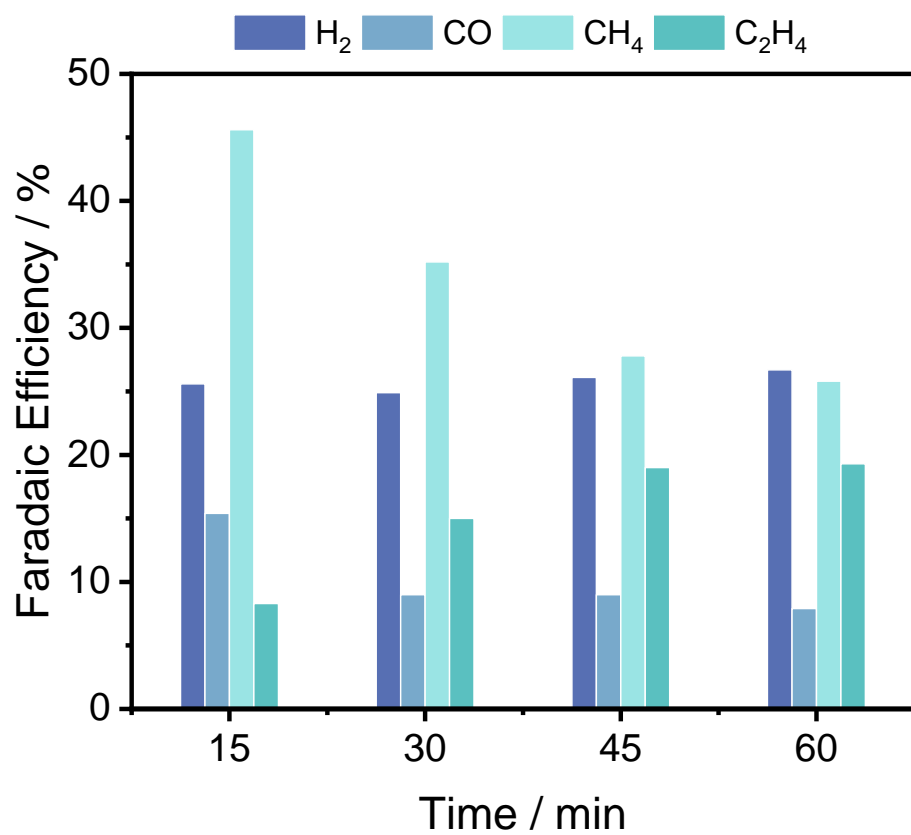

**Figure S6 FE performance of CuPc/CNP.** The optimal ratio of 1.5:1 was used for CuPc/CNP catalyst. The tests were performed at a constant current of 100 mA cm<sup>-2</sup>. 5 mM H<sub>2</sub>SO<sub>4</sub> was circulated as anolyte.

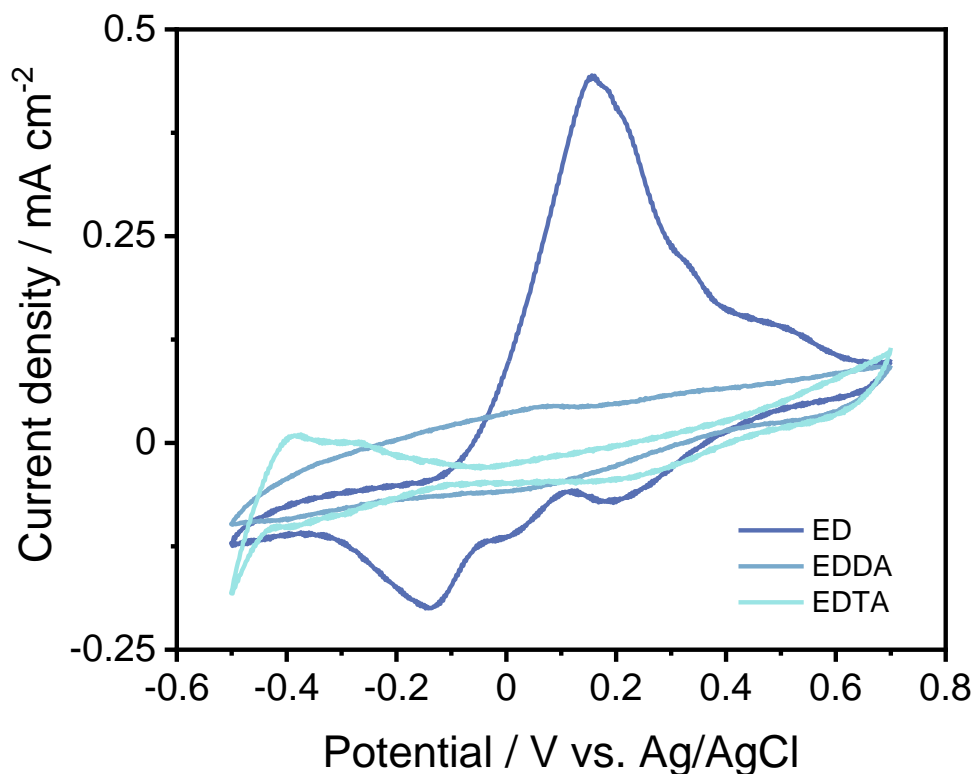

**Figure S7 CV characterization of Cu redox peaks.** Ethylenediamine (ED), ethylenediamine-N,N'-diacetic acid (EDDA), and ethylenediaminetetraacetic acid (EDTA) provide bidentate, tetradentate and hexadentate coordinated sites, respectively. 1 mM  $\text{CuSO}_4$  was added to 10 mM ED, EDDA and EDTA, respectively, to form the Cu complex by bonding Cu ion with multidentate coordination sites. The EDDA presented a much lower Cu redox peak compared with the ED, indicating more intensive bonds between Cu and EDDA. For EDTA, barely Cu redox peaks were observed, demonstrating a stronger interaction between Cu and EDTA. Pt foil and Pt gauze were used as working and counter electrodes. The tests were performed at a scan rate of  $100 \text{ mV s}^{-1}$ .

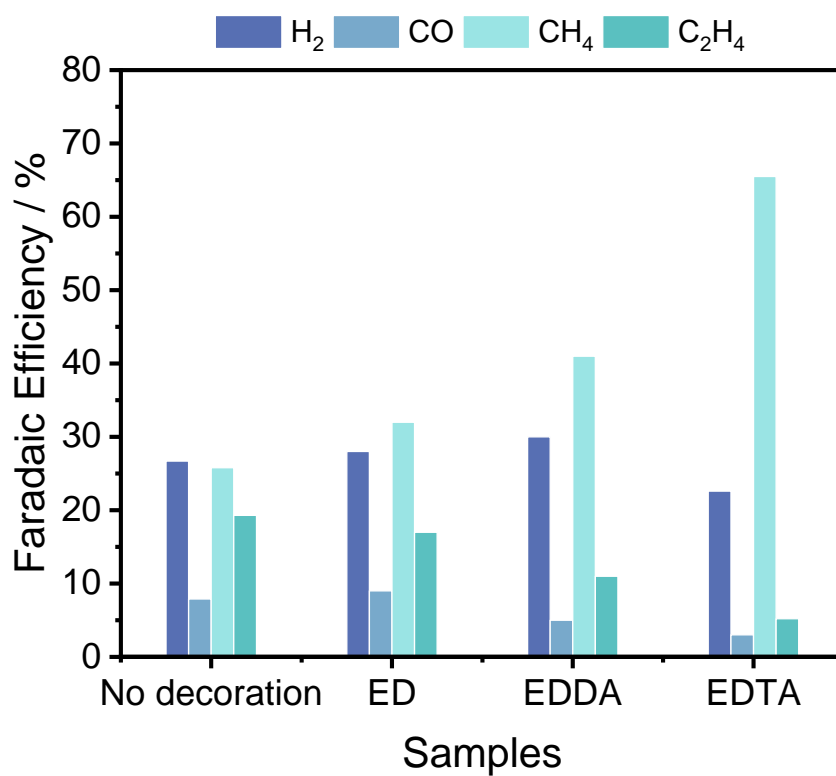

**Figure S8 FE performance of CuPc/CNP samples with and without decoration at the initial 1 hour of electrolysis.** The optimal ratio of 1.5:1 was used for CuPc/CNP catalyst. The ratio between CuPc/CNP and each molecule keep constant at 1:4. The tests were performed at a constant current of  $100 \text{ mA cm}^{-2}$ .  $5 \text{ mM H}_2\text{SO}_4$  was circulated as anolyte.

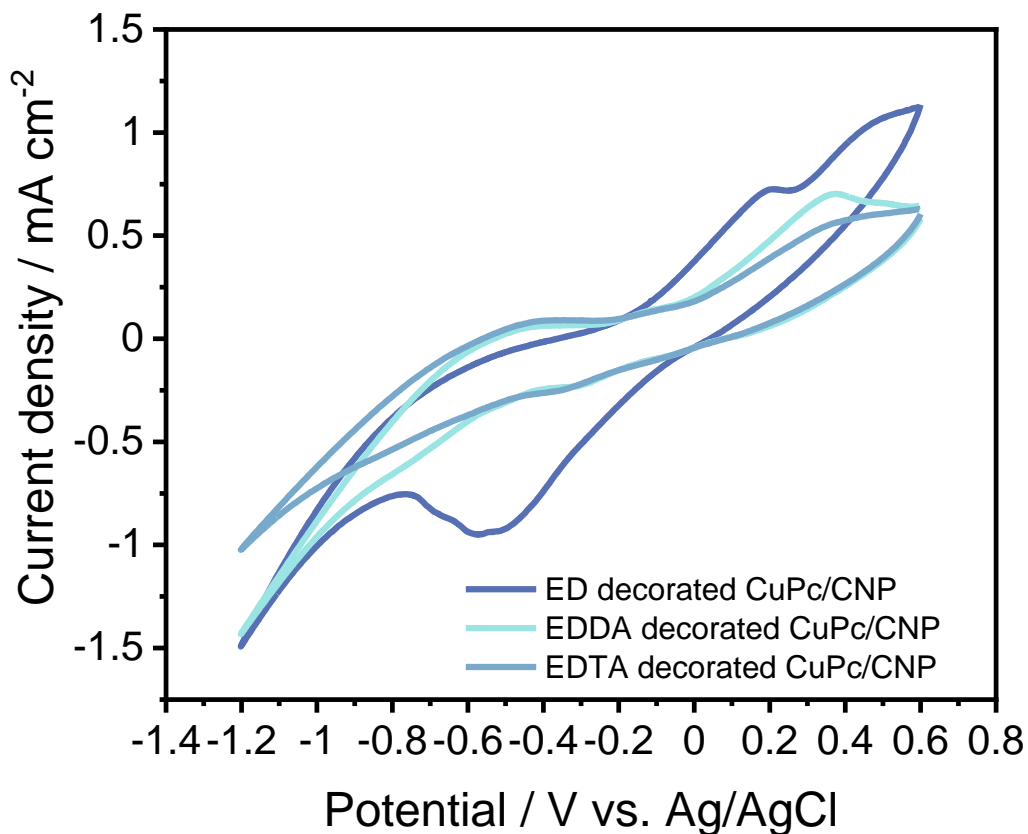

**Figure S9 CV characterization of Cu redox peaks.** The ratio between CuPc/CNP and each molecule keep constant at 1:4. We fabricated the ED, EDDA and EDTA decorated CuPc/CNP composite catalysts by spray-coating the mixture onto the gas diffusion layers (GDLs). The tests were performed at a scan rate of 100 mV s<sup>-1</sup> in a 5 mM H<sub>2</sub>SO<sub>4</sub> electrolyte. The molecules decorated CuPc/CNP GDLs were used as the working electrode. ED decorated sample showed an obvious Cu redox peak, indicating a weak interaction between Cu(II) and ED. EDTA decorated samples presented minimal Cu redox peaks, indicating a strong interaction between Cu and hexadentate coordination sites that constrain Cu(II) from the CuPc/CNP precursor.



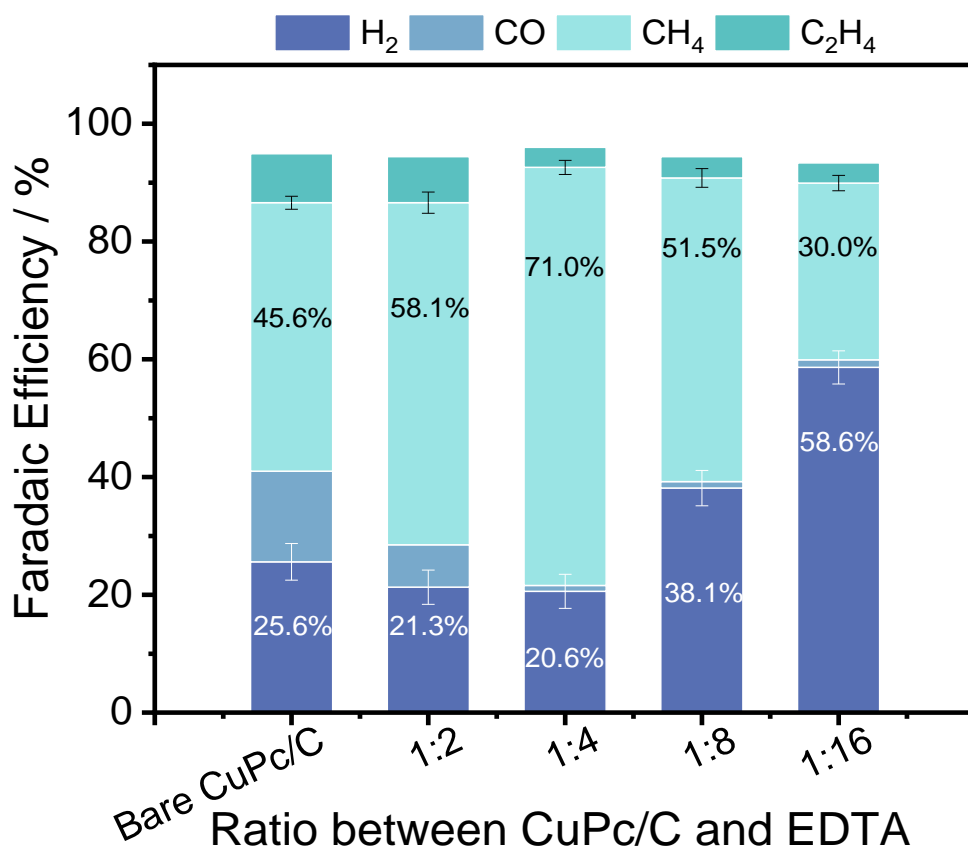

**Figure S10 Product distribution of the CuPc/CNP/EDTA samples with various EDTA mass loadings.** The CuPc/CNP ratio was constant at 1.5:1. The applied current density was at a constant value of 100 mA cm<sup>-2</sup>. Values are means, and error bars indicate SD (n = 3 replicates)

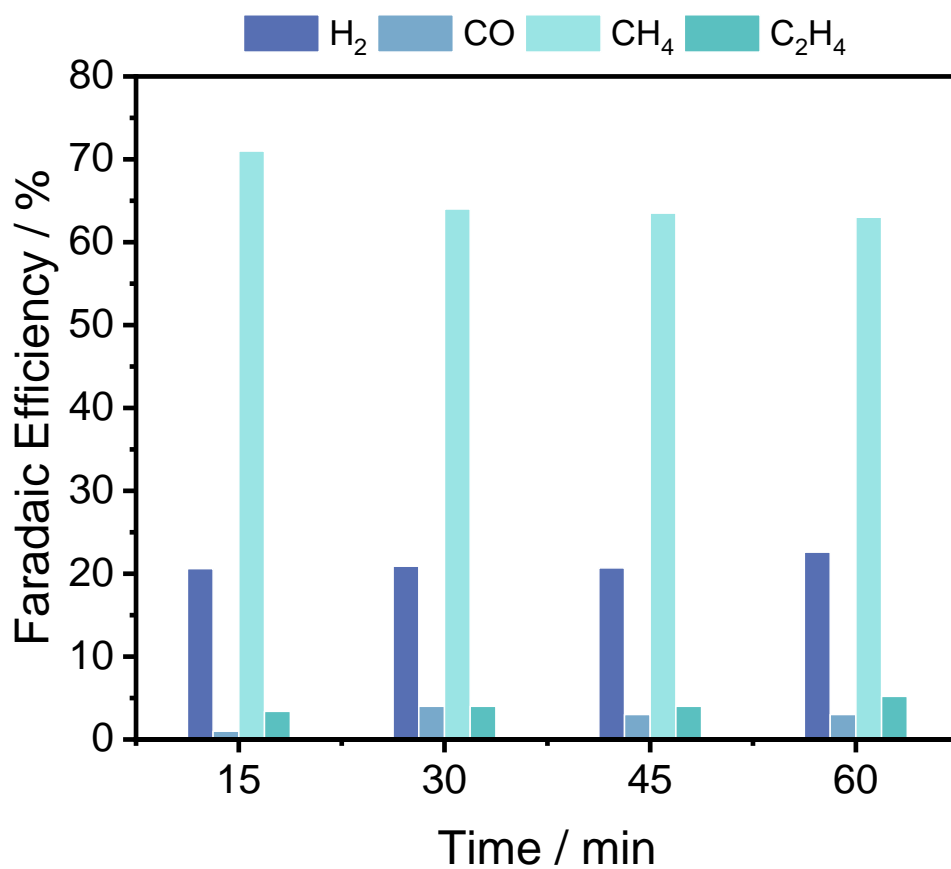

**Figure S11 FE performance of EDTA decorated CuPc/CNP.** The ratio between EDTA and CuPc/CNP was 1:4. The tests were performed at a constant current of  $100 \text{ mA cm}^{-2}$ .  $5 \text{ mM H}_2\text{SO}_4$  was circulated as anolyte.

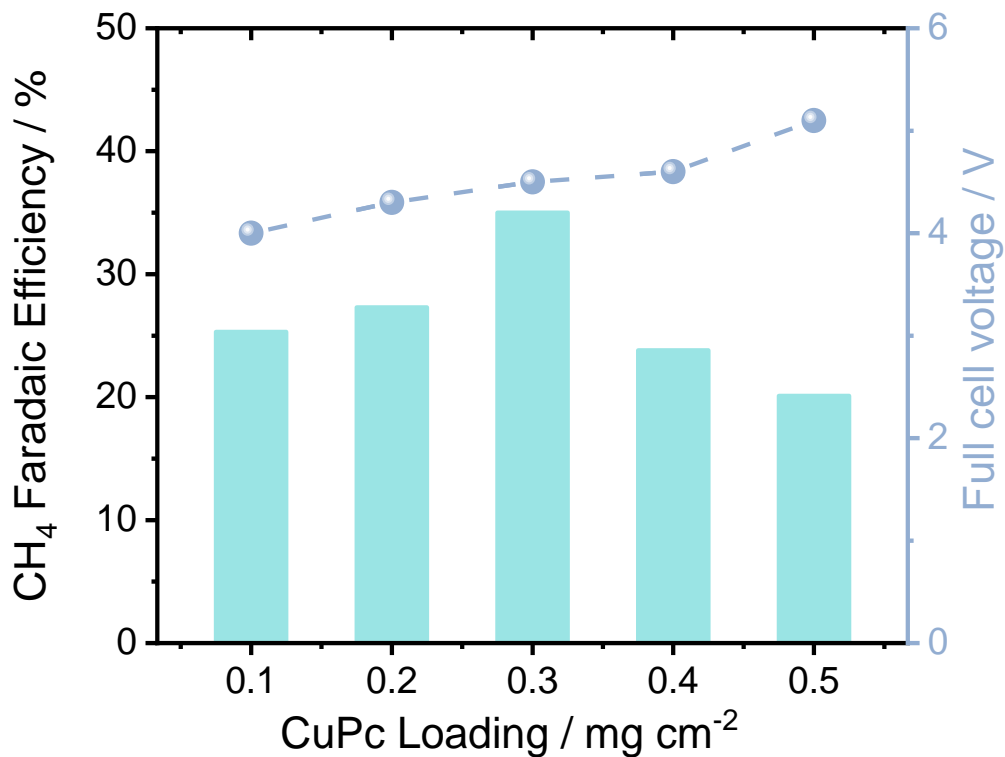

**Figure S12  $\text{CH}_4$  selectivity of the pristine CuPc.** The CuPc loadings ranged from 0.1 to 0.5  $\text{mg cm}^{-2}$ . There is no CNP and EDTA addition in this pristine CuPc. Ionomer binder was PiperIon. The tests were performed at a constant current of 100  $\text{mA cm}^{-2}$ . 5 mM  $\text{H}_2\text{SO}_4$  was circulated as anolyte.

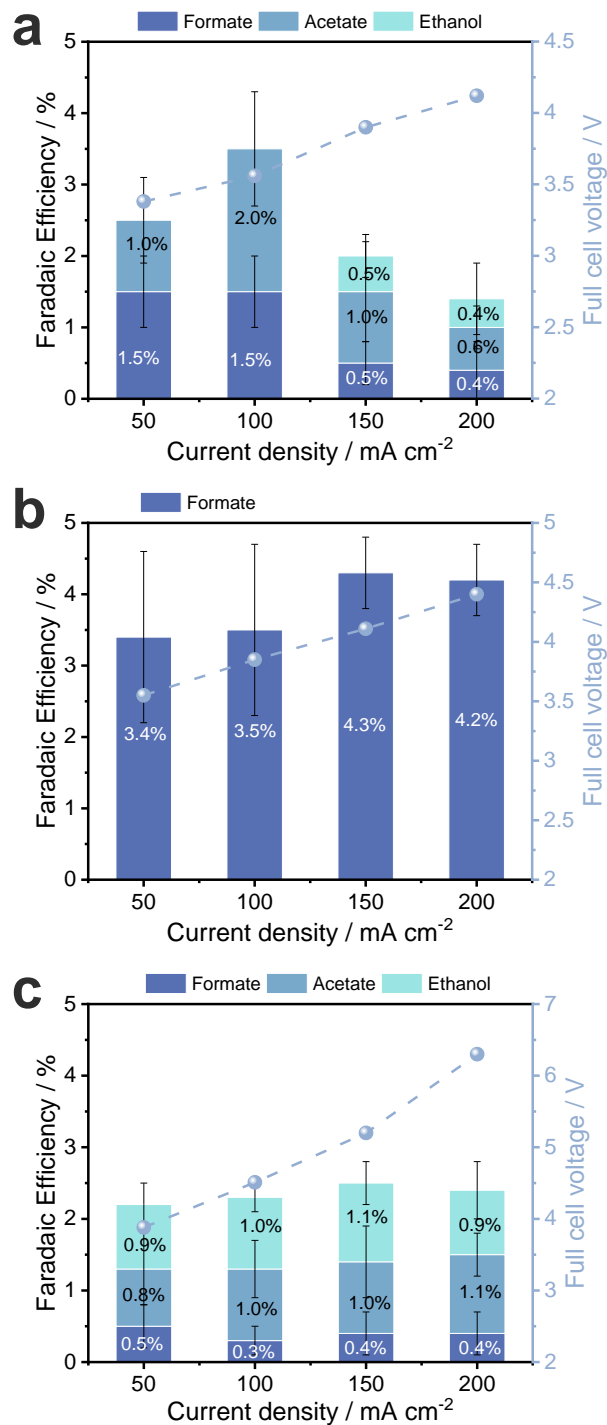

**Figure S13 Liquid products distribution of different samples.** (a) EDTA/CuPc/CNP, (b) EDTA/CNP and (c) EDTA/CuPc at current range from 50 to 200 mA cm<sup>-2</sup>. Values are means, and error bars indicate SD (n = 3 replicates)

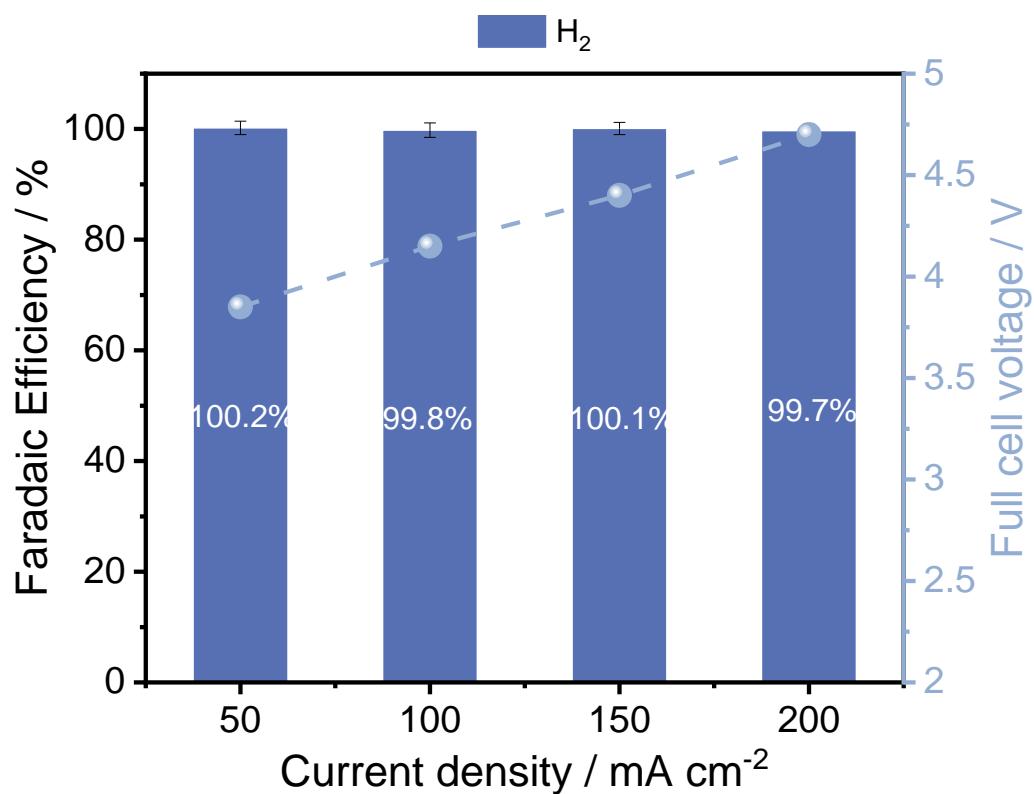

**Figure S14 FE performance under Ar conditions.** The samples EDTA/CuPc/CNP was used as cathode and reduction reaction was performed at different current densities ranging from 50 to 200  $\text{mA cm}^{-2}$ . The Ar flow rate was 20  $\text{sccm cm}^{-2}$ . Values are means, and error bars indicate SD ( $n = 3$  replicates)

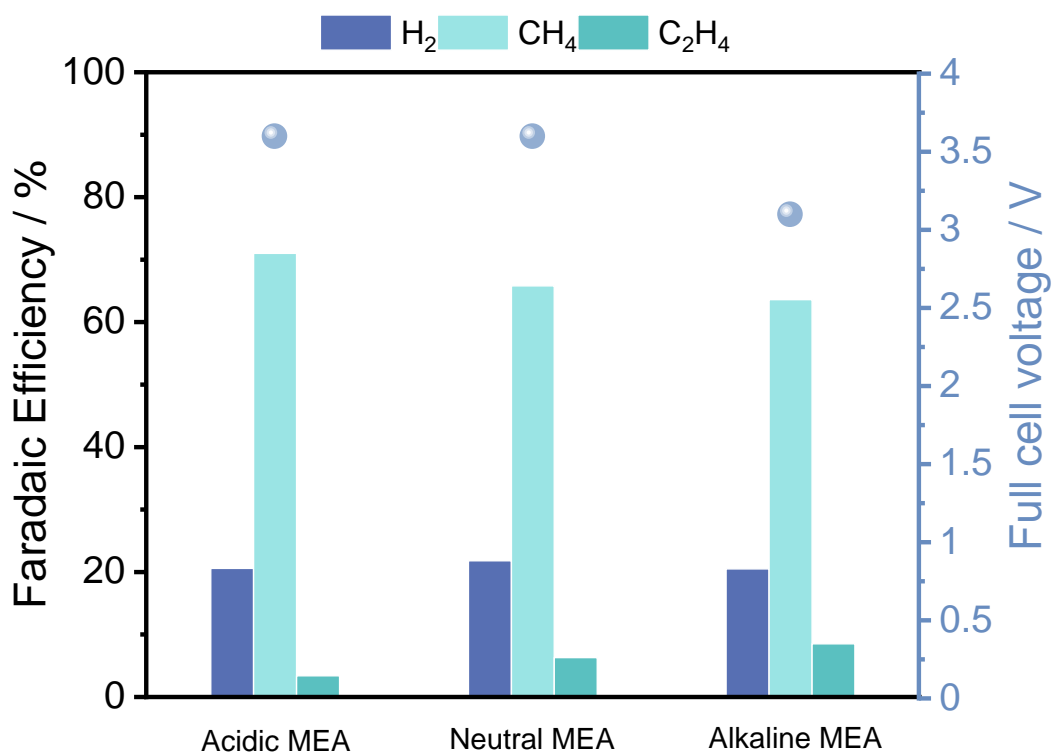

**Figure S15 CO<sub>2</sub>R performance comparison of acidic, neutral and alkaline MEA systems.** The tests were performed at a constant current of 100 mA cm<sup>-2</sup>. The cathode used was the optimized EDTA/CuPc/CNP sample.

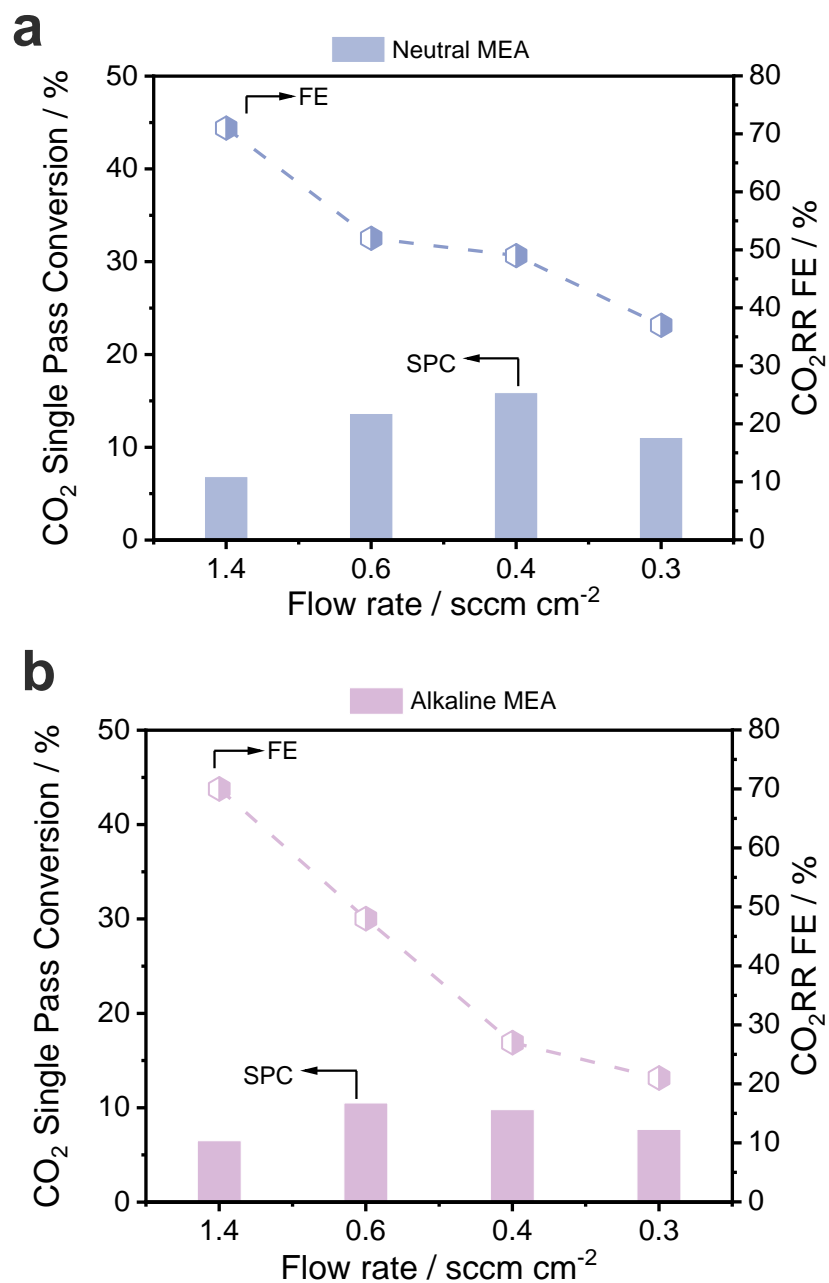

**Figure S16 Single pass conversion of CO<sub>2</sub> at different flow rates.** (a) In the neutral MEA system, a neutral 0.5 M KHCO<sub>3</sub> was used as the anolyte and (b) In the alkaline MEA system, 0.5M KOH was used as the anolyte. The anolyte flow rate was 5mL min<sup>-1</sup>. The cathode and anode were separated by an anion exchange membrane. The SPC results were obtained at a constant current density of 100 mA cm<sup>-2</sup>.

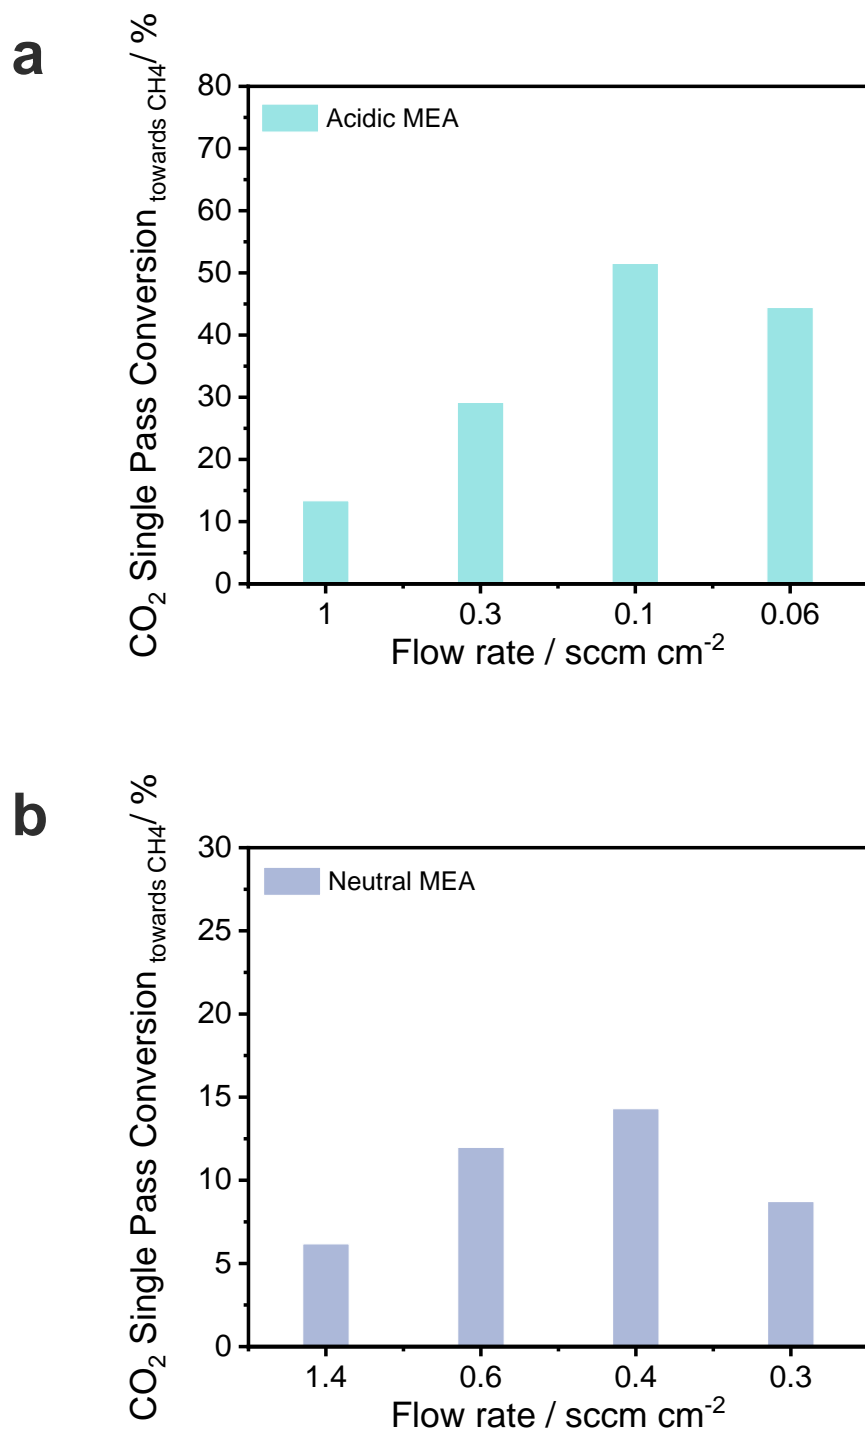

**Figure S17 CO<sub>2</sub> single pass conversion towards CH<sub>4</sub>.** (a) Acidic MEA system, (b) neutral MEA system. In the neutral system, 0.5 M KHCO<sub>3</sub> was used as anolyte with a constant flow rate of 5 mL min<sup>-1</sup>. An anion exchange membrane was used in the neutral MEA to separate the cathode and anode. The SPC results were obtained at a constant current density of 100 mA cm<sup>-2</sup>.



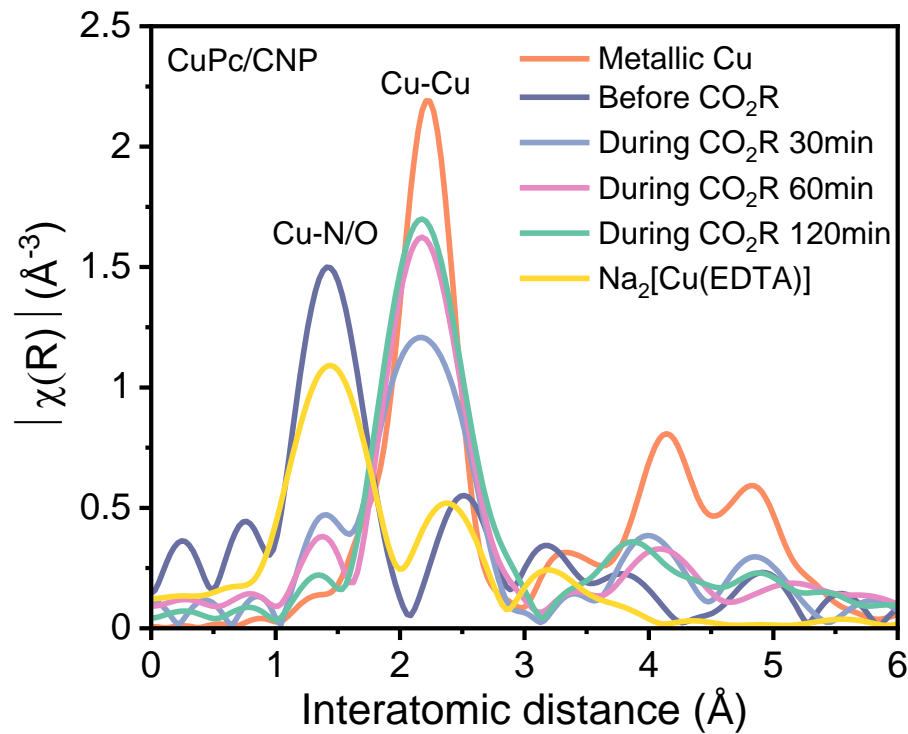

**Figure S18** *In-situ* Fourier-transformed Cu EXAFS spectra of CuPc/CNP. Spectra collected at 100 mA cm<sup>-2</sup> under CO<sub>2</sub>R conditions. Metallic Cu, and Na<sub>2</sub>[Cu(EDTA)] samples are shown as references.

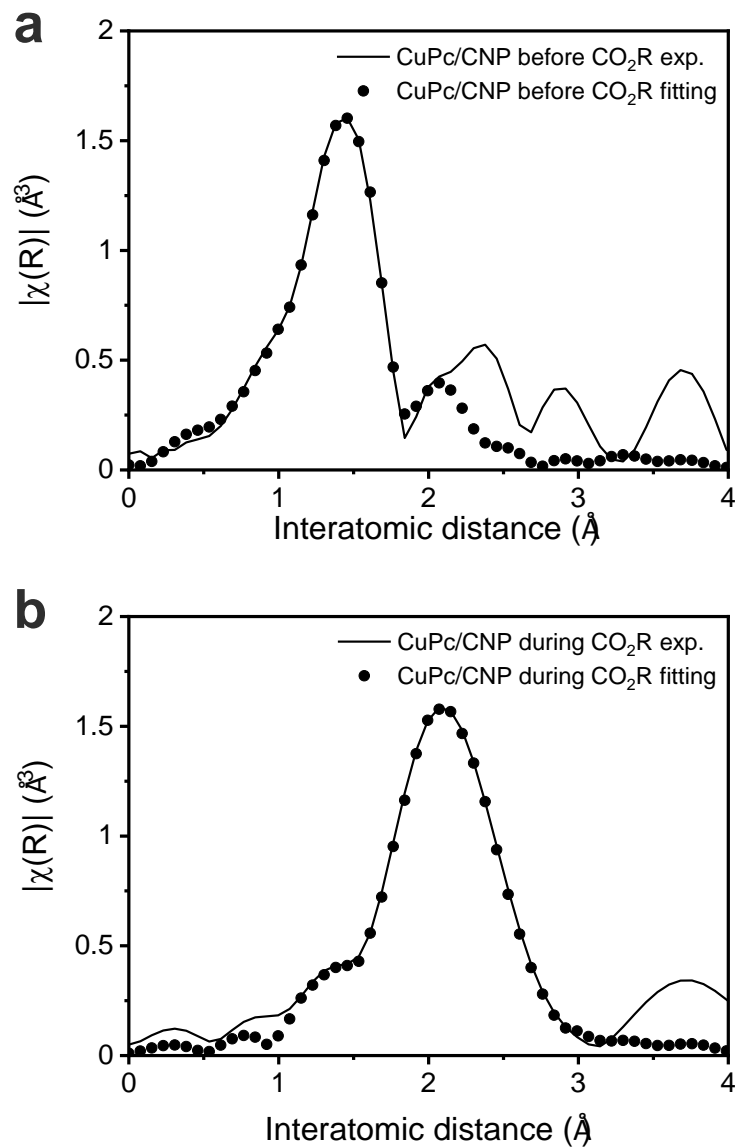

**Figure S19 Fourier-transformed Cu K-edge EXAFS spectra fitting lines for the CuPc/CNP sample.** Fitting lines for samples (a) before and (b) during CO<sub>2</sub>R. The spectrum was taken under 100 mA cm<sup>-2</sup> during 120 min of CO<sub>2</sub>R.

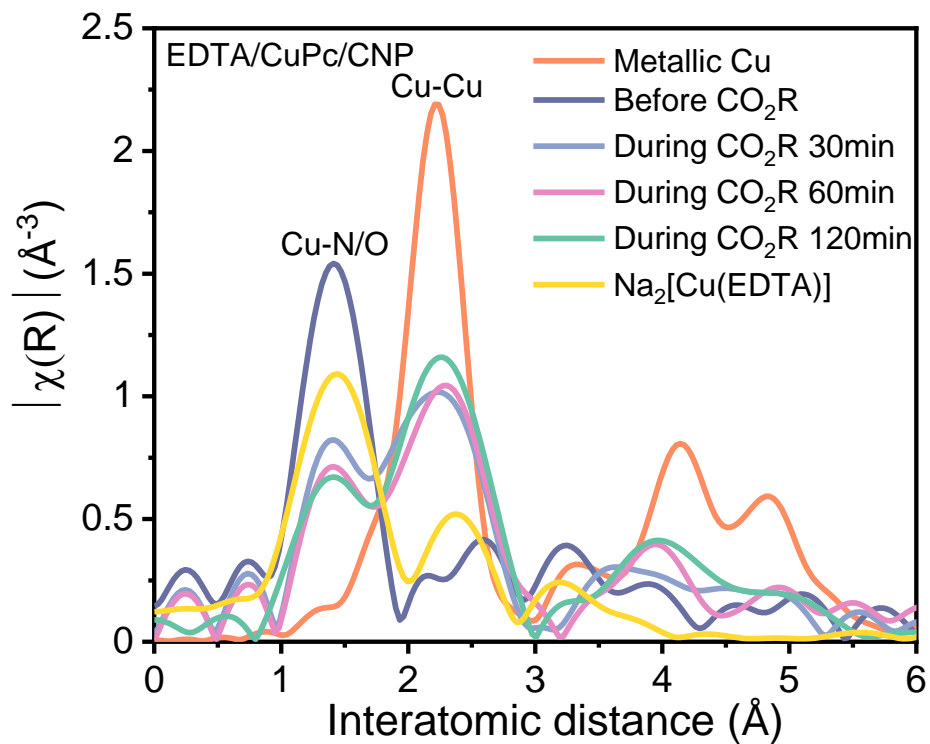

**Figure S20** *In-situ* Fourier-transformed Cu EXAFS spectra of EDTA decorated CuPc/CNP. Spectra collected at  $100 \text{ mA cm}^{-2}$  under  $\text{CO}_2\text{R}$  conditions. Metallic Cu, and  $\text{Na}_2[\text{Cu}(\text{EDTA})]$  samples are shown as references.

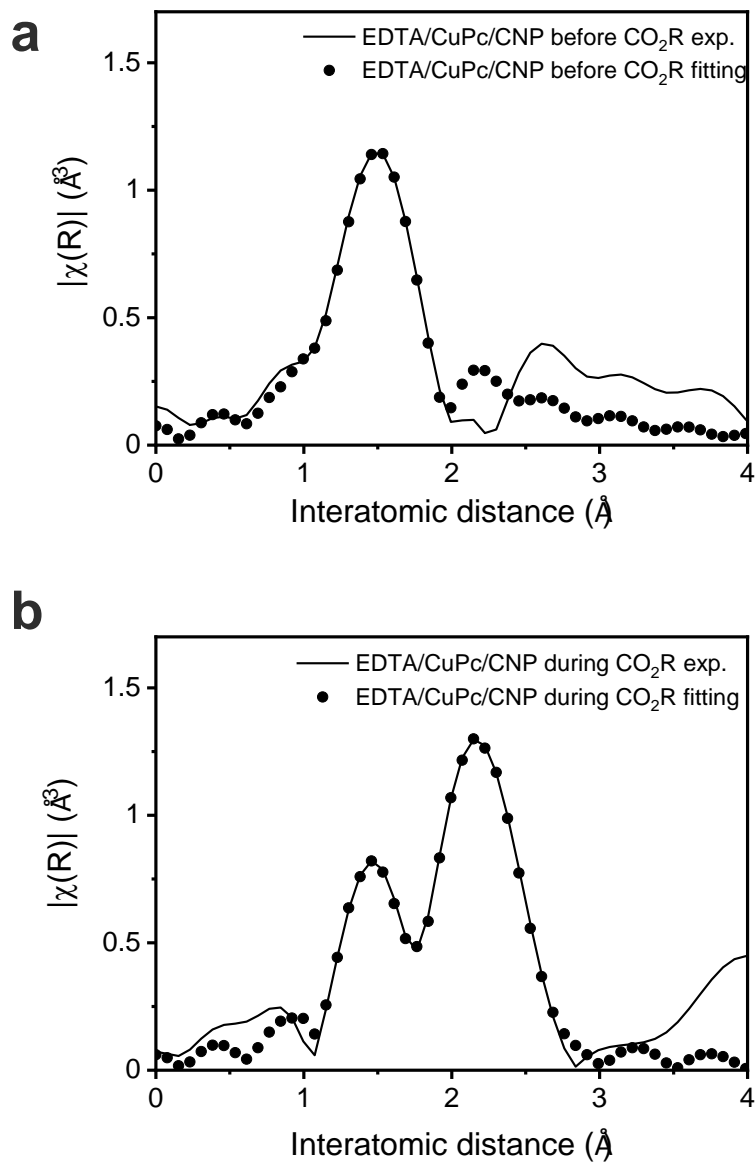

**Figure S21 Fourier-transformed Cu K-edge EXAFS spectra fitting lines for the EDTA decorated CuPc/CNP sample.** Fitting lines for samples (a) before and (b) during CO<sub>2</sub>R. The spectrum was taken under 100 mA cm<sup>-2</sup> during 120 min of CO<sub>2</sub>R.

**Table S2 Fitting parameters for the samples using metallic Cu-Cu and Cu-N/Cu-O paths as three-path fitting.**

|                                           | Path   | C.N.   | R       | dE      | DW       | R factor |
|-------------------------------------------|--------|--------|---------|---------|----------|----------|
| Metallic Cu                               | Cu-Cu  | 12.0   | 2.54(2) | 3.3(7)  | 0.007(1) | 0.007    |
| CuPc/CNP<br>before CO <sub>2</sub> R      | Cu-N/O | 3.8(1) | 1.91(3) | -3.5(2) | 0.007(3) | 0.007    |
| CuPc/CNP<br>during CO <sub>2</sub> R      | Cu-N/O | 0.6(3) | 1.91(1) | -9.0(4) | 0.003(1) | 0.006    |
|                                           | Cu-Cu  | 6.7(2) | 2.50(3) | -9.0(4) | 0.009(4) |          |
| EDTA/CuPc/CNP<br>before CO <sub>2</sub> R | Cu-N/O | 3.6(1) | 1.94(3) | -4.8(4) | 0.003(1) | 0.008    |
| EDTA/CuPc/CNP<br>during CO <sub>2</sub> R | Cu-N/O | 2.5(1) | 1.89(1) | -2.4(3) | 0.006(5) | 0.006    |
|                                           | Cu-Cu  | 5.4(2) | 2.56(3) | -2.4(3) | 0.009(4) |          |

**Table S3 XPS integration areas for Cu 2p peaks and peak ratios of Cu(II):Cu(0)/(I)**

|                                           | Cu(II)<br>2p <sub>3/2</sub> | Cu(0)/(I)<br>2p <sub>3/2</sub> | Cu(II)<br>2p <sub>1/2</sub> | Cu(0)/(I)<br>2p <sub>1/2</sub> | Peak ratio<br>2p <sub>3/2</sub><br>Cu(0)/(I): Cu(II) | Peak ratio<br>2p <sub>1/2</sub><br>Cu(0)/(I) Cu(II) |
|-------------------------------------------|-----------------------------|--------------------------------|-----------------------------|--------------------------------|------------------------------------------------------|-----------------------------------------------------|
| CuPc/CNP<br>before CO <sub>2</sub> R      | 20184.6                     | -                              | 13841.7                     | -                              | -                                                    | -                                                   |
| CuPc/CNP<br>after CO <sub>2</sub> R       | 24201.5                     | 41486.2                        | 10368.8                     | 22726.9                        | 1.7                                                  | 2.2                                                 |
| EDTA/CuPc/CNP<br>before CO <sub>2</sub> R | 11611.8                     | -                              | 5412.6                      | -                              | -                                                    | -                                                   |
| EDTA/CuPc/CNP<br>after CO <sub>2</sub> R  | 9590.1                      | 11155.5                        | 5116.0                      | 5663.3-                        | 1.2                                                  | 1.1                                                 |

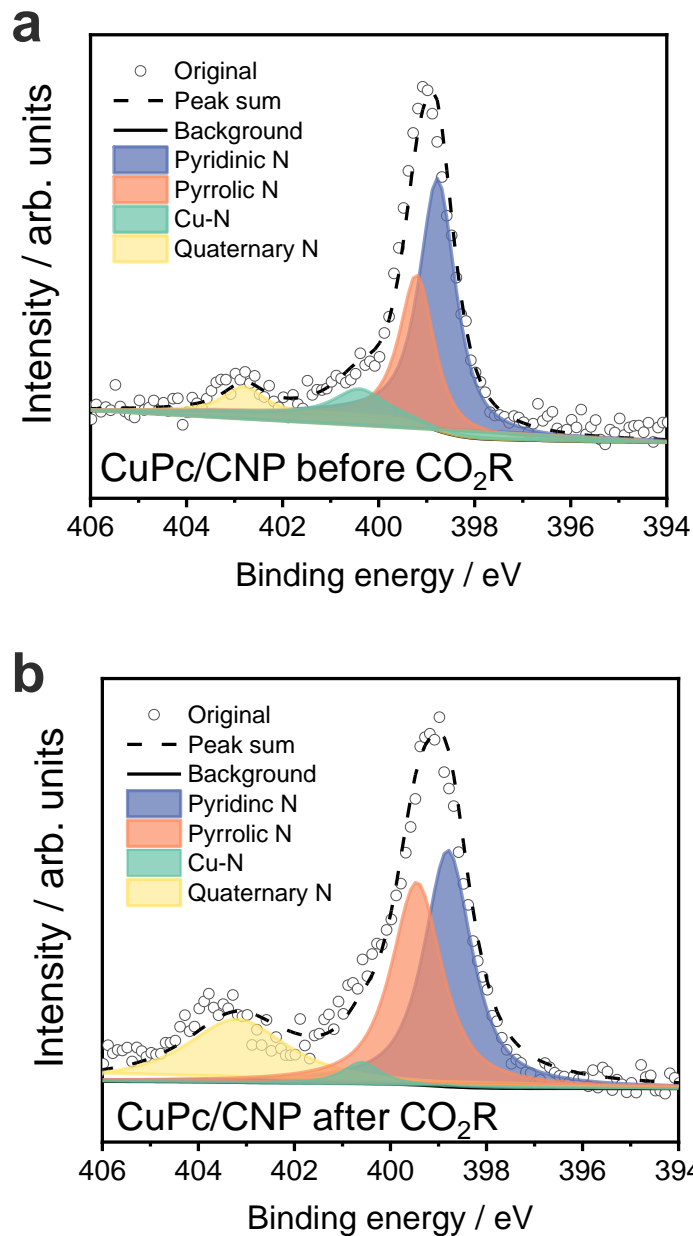

**Figure S22 X-ray photoelectron spectra (XPS) high-resolution N 1s spectra of the CuPc/CNP samples.** (a) Before CO<sub>2</sub>R and (b) after CO<sub>2</sub>R. For the post-electrolysis sample, we used N<sub>2</sub> to protect the cell when the current was cut off, and transferred the cell to a glove box. We disassembled the cell and stored the sample in a glove box to avoid contacting with O<sub>2</sub>.

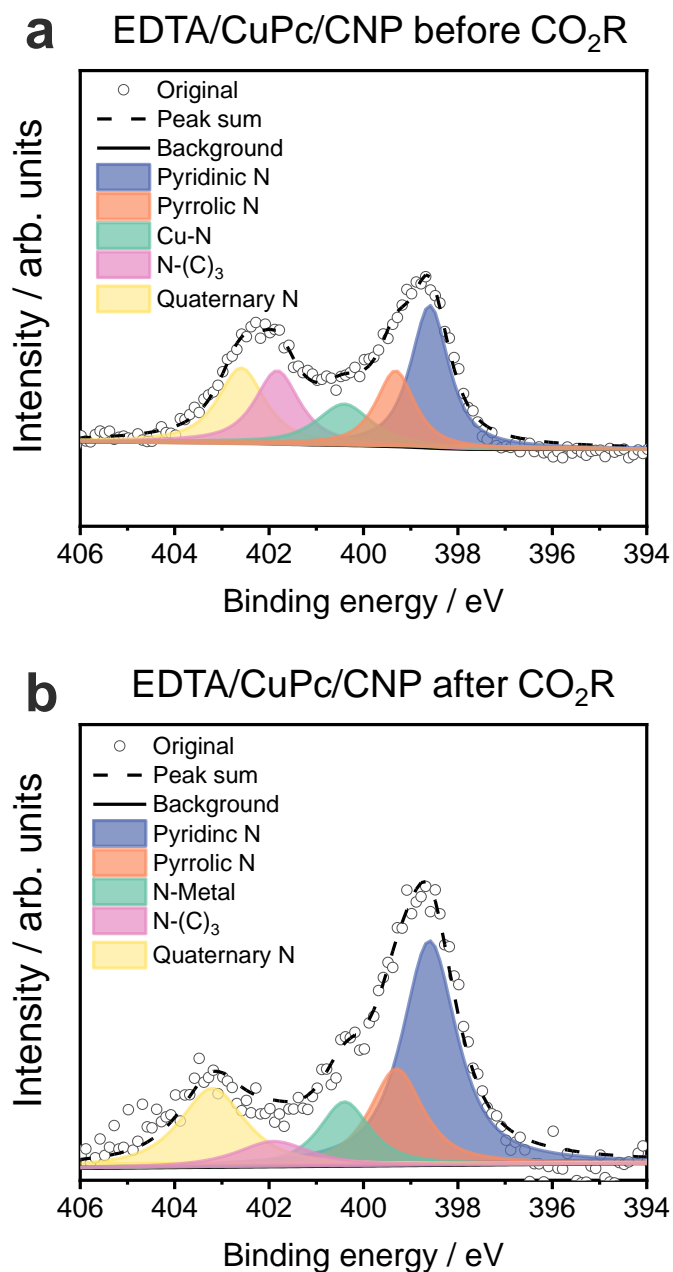

**Figure S23 X-ray photoelectron spectra (XPS) high-resolution N 1s spectra of the EDTA decorated CuPc/CNP samples.** (a) Before CO<sub>2</sub>R and (b) after CO<sub>2</sub>R. For the post-electrolysis sample, we used N<sub>2</sub> to protect the cell when the current was cut off, and transferred the cell to a glove box. We disassembled the cell and stored the sample in a glove box to avoid contacting with O<sub>2</sub>.



**Table S4 XPS integration areas for N 1s peaks. The Cu-N peak area normalized by the inert pyridinic peak area (which is assumed to not change during the reaction)**

|                                        | Pyridinic N | Pyrrolic N | Cu-N   | N-(C) <sub>3</sub> | Quaternary N | Cu-N normalized value | Cu-N lost ratio |
|----------------------------------------|-------------|------------|--------|--------------------|--------------|-----------------------|-----------------|
| CuPc/CNP before CO <sub>2</sub> R      | 18011.5     | 10011.5    | 2511.5 | -                  | 2011.5       | 0.14                  | 57%             |
| CuPc/CNP after CO <sub>2</sub> R       | 12070.4     | 9047.6     | 770.6  | -                  | 6238.3       | 0.06                  |                 |
| EDTA/CuPc/CNP before CO <sub>2</sub> R | 12649.1     | 6780.6     | 5295.4 | 7558.6             | 8101.1       | 0.42                  | 35%             |
| EDTA/CuPc/CNP after CO <sub>2</sub> R  | 4483.1      | 1875.8     | 1193.5 | 679.8              | 1889.2       | 0.27                  |                 |

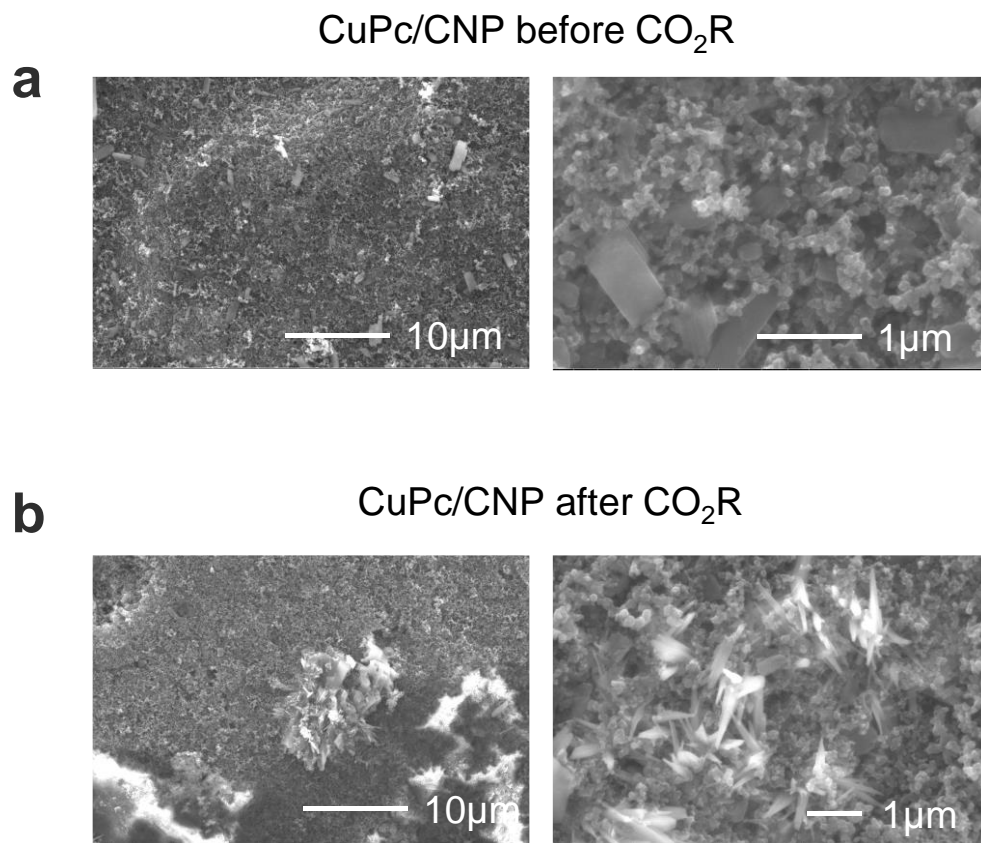

**Figure S24 Scanning electron microscopy (SEM) and images of the CuPc/CNP sample. (a)** before CO<sub>2</sub>R, (b) after CO<sub>2</sub>R. The CO<sub>2</sub>R condition was under 100 mA cm<sup>-2</sup> in an acidic MEA cell. All post-electrolysis samples were protected with N<sub>2</sub> before characterizations.

## EDTA/CuPc/CNP before CO<sub>2</sub>R

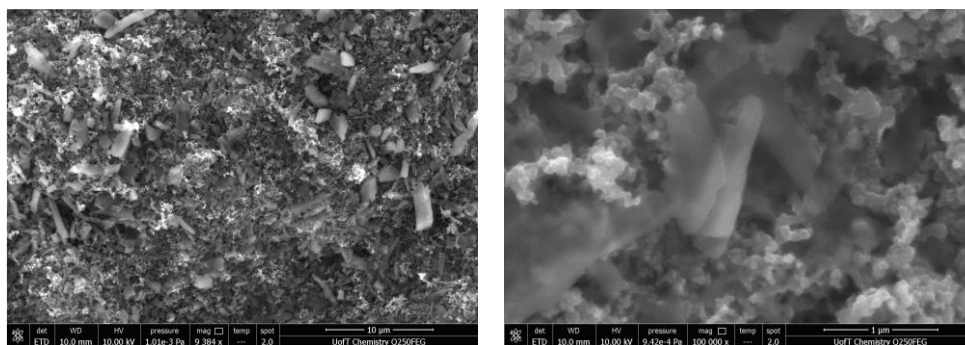

## EDTA/CuPc/CNP after CO<sub>2</sub>R

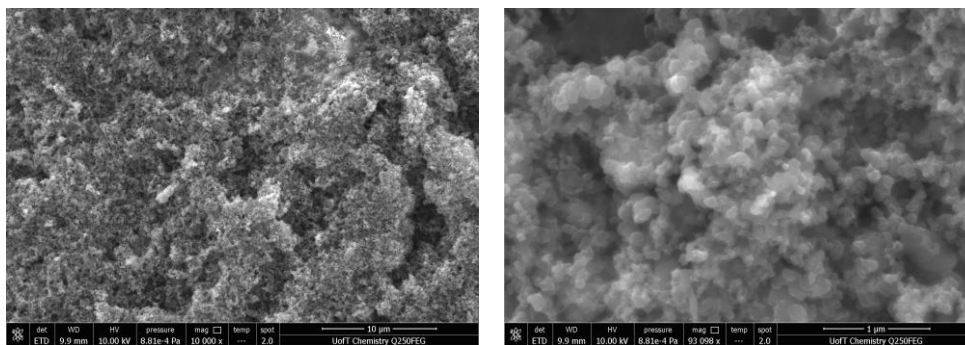

**Figure S25 Scanning electron microscopy (SEM) and images of the EDTA decorated CuPc/CNP sample. (a) before CO<sub>2</sub>R, (b) after CO<sub>2</sub>R. The CO<sub>2</sub>R condition was under 100 mA cm<sup>-2</sup> in an acidic MEA cell. All post-electrolysis samples were protected with N<sub>2</sub> before characterizations.**

## References

- 1 Ozden, A. *et al.* Cascade CO<sub>2</sub> electroreduction enables efficient carbonate-free production of ethylene. *Joule* **5**, 706-719 (2021).
- 2 Xie, K. *et al.* Bipolar membrane electrolyzers enable high single-pass CO<sub>2</sub> electroreduction to multicarbon products. *Nat Commun* **13**, 3609 (2022).
- 3 Ma, M. *et al.* Insights into the carbon balance for CO<sub>2</sub> electroreduction on Cu using gas diffusion electrode reactor designs. *Energy Environ. Sci.* **13**, 977-985 (2020).
- 4 Sisler, J. *et al.* Ethylene electrosynthesis: A comparative techno-economic analysis of alkaline vs membrane electrode assembly vs CO<sub>2</sub>-CO-C<sub>2</sub>H<sub>4</sub> tandems. *ACS Energy Lett.* **6**, 997-1002 (2021).
- 5 Keith, D. W., Holmes, G., St. Angelo, D. & Heidel, K. A process for capturing CO<sub>2</sub> from the atmosphere. *Joule* **2**, 1573-1594 (2018).
- 6 Gao, H. *et al.* Comparative studies of heat duty and total equivalent work of a new heat pump distillation with split flow process, conventional split flow process, and conventional baseline process for CO<sub>2</sub> capture using monoethanolamine. *Int. J. Greenh. Gas Control.* **24**, 87-97 (2014).
- 7 Xu, Y. *et al.* Low coordination number copper catalysts for electrochemical CO<sub>2</sub> methanation in a membrane electrode assembly. *Nat. Commun.* **12**, 2932 (2021).
- 8 Zhang, L. *et al.* Enhanced cuprophilic interactions in crystalline catalysts facilitate the highly selective electroreduction of CO<sub>2</sub> to CH<sub>4</sub>. *J. Am. Chem. Soc.* **143**, 3808-3816 (2021).
